# Supplementary material for: Comparison of timing of relapse in dogs with nonassociative immune‐mediated hemolytic anemia, thrombocytopenia, or polyarthritis
Source: PubMed Central journal article supplement (PMC10937512; doi:10.1111/jvim.17004), 2024-02-02
Supplement: JVIM-38-1035-s001.pdf [file JVIM-38-1035-s001.pdf]

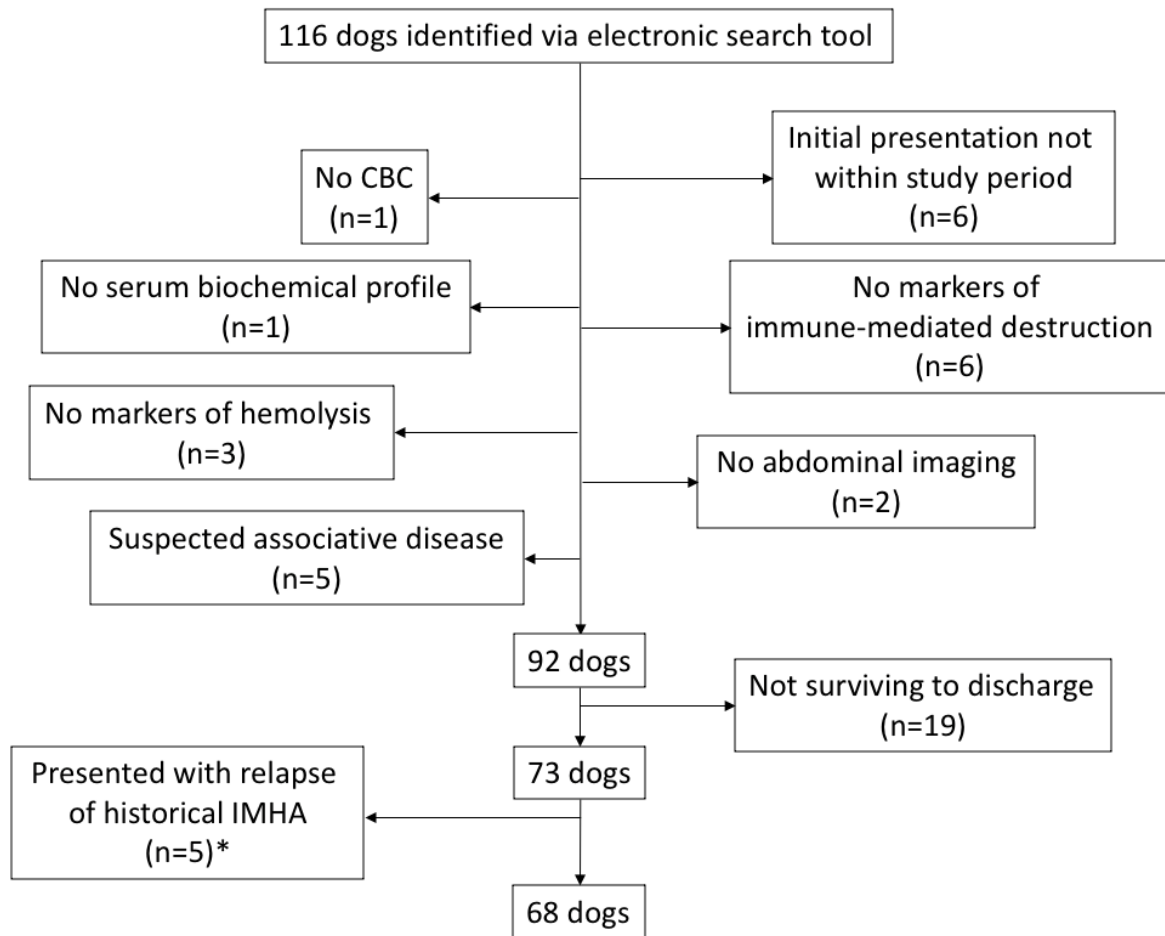

Supplementary Figure 1: Flow diagram demonstrating reasons for exclusion among 116 dogs identified with IMHA during the study period. \*5 dogs presenting with relapse of historical IMHA included in the case-control study comparing rates of relapse in dogs that were or were not vaccinated after initial diagnosis. IMHA, immune-mediated hemolytic anemia.

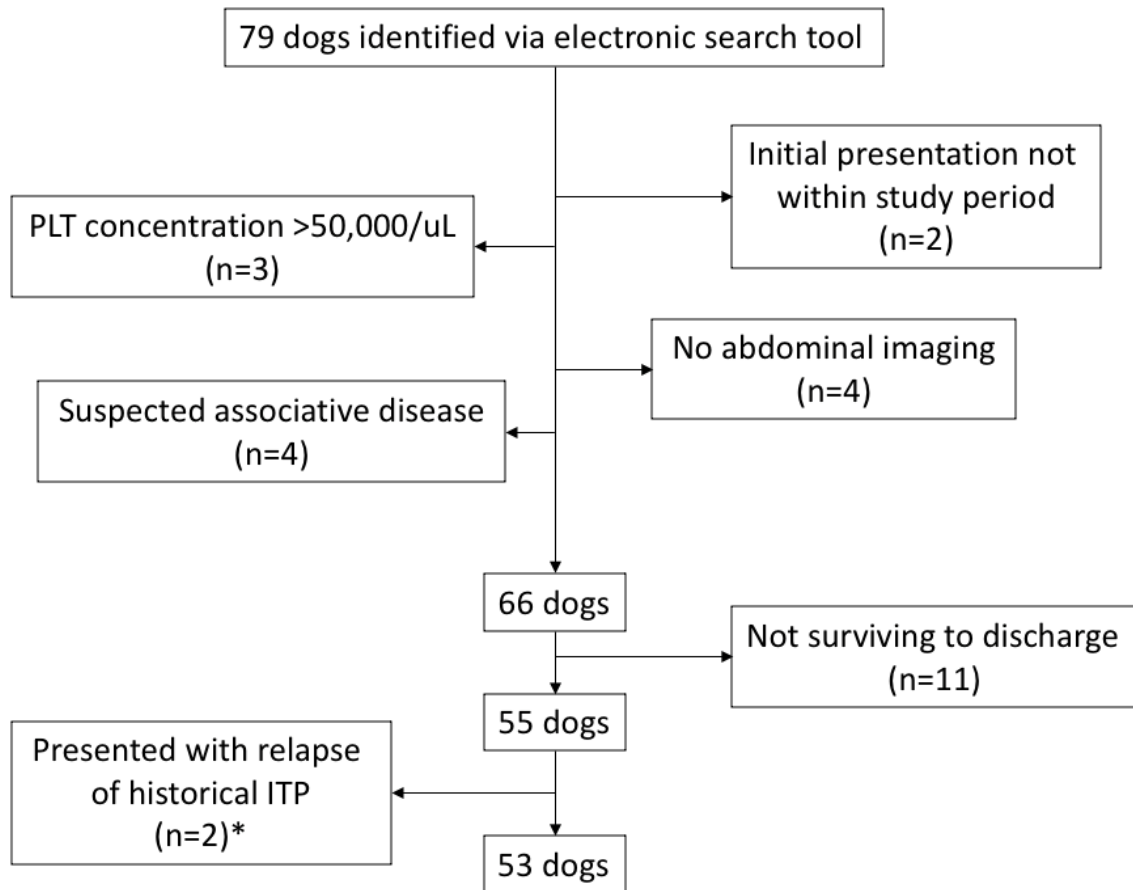

Supplementary Figure 2: Flow diagram demonstrating reasons for exclusion among 79 dogs identified with ITP during the study period. \*2 dogs presenting with relapse of historical ITP included in the case-control study comparing rates of relapse in dogs that were or were not vaccinated after initial diagnosis. ITP immune thrombocytopenia, PLT platelet concentration.

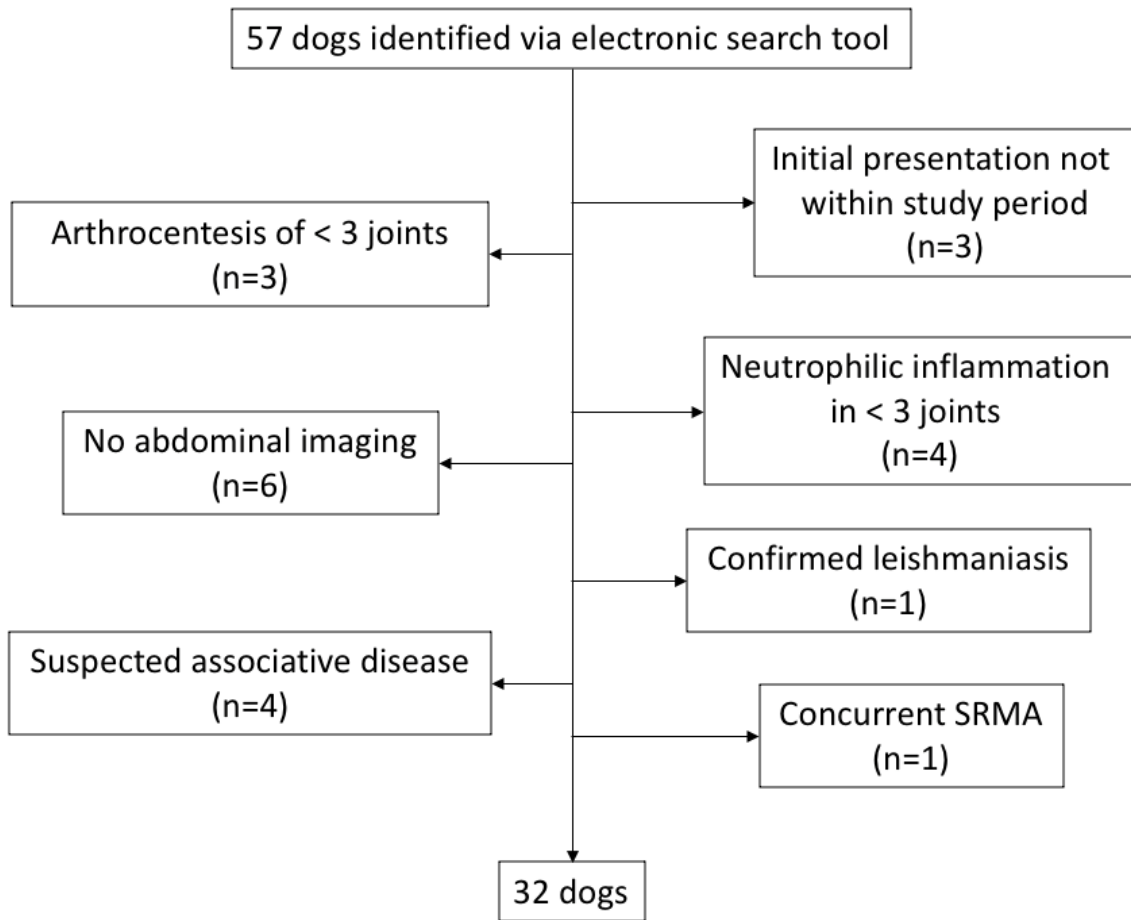

Supplementary Figure 3: Flow diagram demonstrating reasons for exclusion among 57 dogs identified with IMPA during the study period. IMPA immune-mediated polyarthritis, SRMA steroid-responsive meningitis arteritis.
