# Supplementary material for: Comparison of timing of relapse in dogs with nonassociative immune‐mediated hemolytic anemia, thrombocytopenia, or polyarthritis
Source: PubMed Central journal article supplement (PMC10937512; doi:10.1111/jvim.17004), 2024-02-02
Supplement: JVIM-38-1035-s002.pdf [file JVIM-38-1035-s002.pdf]

Supplementary Table 1: Demographic characteristics of dogs with IMHA, ITP and IMPA.

|                             |                     | IMHA                   | ITP                     | IMPA                    |
|-----------------------------|---------------------|------------------------|-------------------------|-------------------------|
| Dogs surviving to discharge |                     | 73                     | 55                      | 32                      |
| Age at presentation (years) |                     | 6.70<br>(SD ± 2.88)    | 6.61<br>(SD ± 2.61)     | 5.28<br>(SD ± 3.14)     |
| Bodyweight (kg)             |                     | 16.0<br>(IQR 8.9-25.0) | 16.7<br>(IQR 11.4-26.4) | 13.85<br>(IQR 9.8-28.4) |
| Gender                      | Female neutered (%) | 35 (47.9)              | 31 (56.4)               | 13 (40.6)               |
|                             | Male neutered (%)   | 24 (32.9)              | 13 (23.6)               | 10 (31.3)               |
|                             | Female entire (%)   | 8 (11.0)               | 6 (10.9)                | 2 (6.3)                 |
|                             | Male entire (%)     | 6 (8.2)                | 5 (9.1)                 | 7 (21.9)                |

IQR: Inter-quartile range; SD: standard deviation

Supplementary Table 2: Summary of diagnostic testing performed in dogs diagnosed with IMHA, ITP and IMPA; serology performed via SNAP® 4Dx® Plus (IDEXX Laboratories, Inc.), *Angiostrongylus vasorum* antigen performed via AngioDetect™ rapid assay (IDEXX Laboratories, Inc.)

| Test performed                | IMHA      | ITP       | IMPA      |
|-------------------------------|-----------|-----------|-----------|
| Serology (%)                  | 67 (91.8) | 49 (89.1) | 29 (90.6) |
| Urinalysis (%)                | 68 (93.2) | 41 (74.5) | 32 (100)  |
| Thoracic imaging (%)          | 70 (95.9) | 54 (98.2) | 31 (93.9) |
| Abdominal imaging (%)         | 73 (100)  | 55 (100)  | 32 (100)  |
| Serum biochemistry (%)        | 73 (100)  | 55 (100)  | 32 (100)  |
| Fecal Baermann's (%)          | -         | 18 (32.7) | -         |
| <i>A. vasorum</i> antigen (%) | -         | 33 (60.0) | -         |

Supplementary Table 3: Clinicopathological variables for dogs with IMHA and ITP.

| Variable                                | IMHA                      | ITP                          | Reference range   |
|-----------------------------------------|---------------------------|------------------------------|-------------------|
| Manual platelet concentration (/μL)     | -                         | 20,000<br>(IQR 5,000-20,000) | 150,000 - 900,000 |
| PCV (%)                                 | 14<br>(IQR 12-19)         | 36<br>(± 11.07)              | 37-55             |
| Total protein (g/dL)                    | 7.37<br>(± 0.76)          | 6.91<br>(± 1.27)             | 4.9-7.1           |
| Urea (mg/dL)                            | 21.0<br>(IQR 14.57-25.77) | 7.0<br>(IQR 5.2-9.4)         | 8.4-25.5          |
| Albumin (g/dL)                          | 3.14<br>(IQR 2.83-3.52)   | -                            | 2.8-3.9           |
| Total bilirubin (mg/dL)                 | 0.79<br>(IQR 0.25-1.78)   | -                            | 0.0-0.14          |
| Alanine aminotransferase activity (U/L) | 37<br>(IQR 24-85)         | -                            | 13-88             |

Supplementary Table 4: Features of disease relapse among dogs with IMHA, ITP and IMPA.

| Disease group                                      | IMHA                      | ITP                       | IMPA                       |
|----------------------------------------------------|---------------------------|---------------------------|----------------------------|
| Dogs surviving to discharge                        | 73                        | 55                        | 32                         |
| Dogs presenting with relapse of historical disease | 5                         | 2                         | 0                          |
| Total dogs relapsing                               | 9                         | 8                         | 10                         |
| Relapse <12 months (%)                             | 5 (55.6)                  | 4 (50)                    | 9 (90)                     |
| Relapse 12-24 months (%)                           | 2 (22.2)                  | 3 (37.5)                  | 0 (0)                      |
| Relapse >24 months (%)                             | 2 (22.2)                  | 1 (12.5)                  | 1 (10)                     |
| 12-month relapse rate (%)                          | 11.4<br>(95% CI 3.7-26.5) | 11.4<br>(95% CI 3.1-29.2) | 34.6<br>(95% CI 15.8-65.7) |
| 24-month relapse rate (%)                          | 17.5<br>(95% CI 7.0-36.1) | 22.6<br>(95% CI 9.1-46.5) | 40.9<br>(95% CI 18.7-77.7) |
| Dogs having multiple relapses (%)                  | 1 (11.1)                  | 2 (25)                    | 5 (50)                     |
| Time from diagnosis to relapse                     | 6<br>(IQR 2.5-27.5)       | 12.0<br>(± 9.43)          | 6.79<br>(IQR 2.36-8.2)     |

Supplementary Table 5: Characteristics of initial immunosuppressive treatment, treatment status at the time of relapse and discontinuation of treatment among dogs with IMHA, ITP and IMPA.

|                                                                                         | IMHA                    | ITP                     | IMPA                    |
|-----------------------------------------------------------------------------------------|-------------------------|-------------------------|-------------------------|
| Median prednisolone dose at discharge (mg/kg/day)                                       | 2.20<br>(IQR 1.97-2.98) | 2.19<br>(IQR 1.92-2.55) | 2.42<br>(IQR 1.88-3.0)  |
| Time from discharge to first prednisolone dose reduction (days)                         | 22<br>(IQR 17.25-27.0)  | 28<br>(IQR 17.5-37.0)   | 20<br>(IQR 15.0-24.8)   |
| Prednisolone dose at first dose reduction (mg/kg/day)                                   | 1.61<br>(IQR 1.47-2.04) | 1.67<br>(IQR 1.5-1.90)  | 1.56<br>(IQR 1.41-1.92) |
| Time between first and second dose reduction (days)                                     | 21<br>(IQR 14.8-29.0)   | 24<br>(IQR 14.8-30.3)   | 21<br>(12.5-32.3).      |
| Prednisolone dose at second dose reduction (mg/kg/day)                                  | 1.07<br>(IQR .96-1.30)  | 1.12<br>(IQR .91-1.30)  | 1.11<br>(IQR .95-1.32)  |
| Total duration of treatment with prednisolone (months)                                  | 4.92<br>(IQR 3.93-6.78) | 5.95<br>(IQR 4.42-8.37) | 5.22<br>(IQR 3.3-7.16)  |
| Total duration of treatment with second agent (months)                                  | 6.08<br>(IQR 5.21-7.75) | 7.18<br>(IQR 4.99-8.58) | 7.57<br>(IQR 3.3-13.6)  |
| Dogs with >24 months follow up receiving second agent at discharge                      | 34/40 (85.0%)           | 22/31 (71.0%)           | 13/22 (59.1%)           |
| Proportion of relapsing dogs that received a second immunosuppressive drug at discharge | 6/9<br>(66.7%)          | 6/8 (75.0%)             | 7/10 (70.0%)            |

|                                                                        |                |                |               |
|------------------------------------------------------------------------|----------------|----------------|---------------|
| Dogs that did not relapse receiving second agent at discharge          | 28/31 (90.3%)  | 16/24 (66.7%)  | 6/12 (50%)    |
| Dogs that relapsed whilst receiving immunosuppressive treatment        | 6/9<br>(66.7%) | 4/8<br>(50.0%) | 4/10<br>(40%) |
| Dogs that relapsed after immunosuppressive treatment was discontinued  | 3/9<br>(33.3%) | 4/8<br>(50%)   | 6/10<br>(60%) |
| Proportion of dogs in which immunosuppressive therapy was discontinued | 54/71 (76.1%)  | 17/52 (32.7%)  | 20/29 (69.0%) |
